# Supplementary material for: Identification and Structural Elucidation of Anti-Inflammatory Compounds from Chinese Olive (Canarium Album L.) Fruit Extracts
Source: PubMed Central journal article supplement (PMC6836117; doi:10.3390/foods8100441), 2019-09-26
Supplement: foods-08-00441-s001.pdf [file foods-08-00441-s001.pdf]

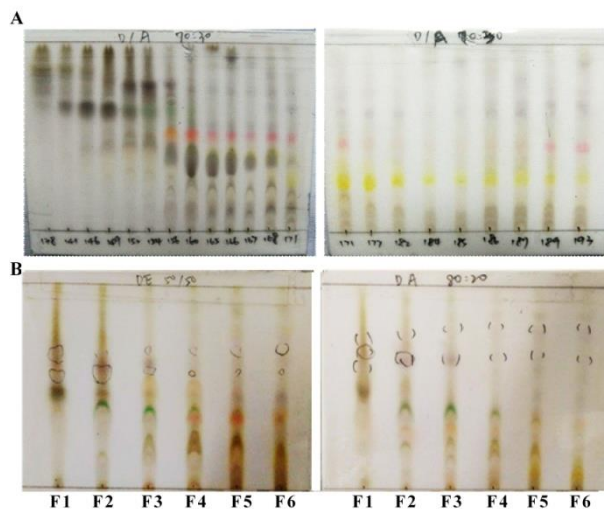

**Figure S1.** TLC result of subfractions from Fr. F. (A) Fractions before merge (mobile phase is Acetone (A) / Dichloromethane (DCM)= 3:7, v/v) (B) Fractions after merge (left TLC plate, mobile phase is Ethyl acetate (EA)/DCM = 1:1, v/v; right TLC plate, mobile phase is A/DCM= 2:8, v/v).

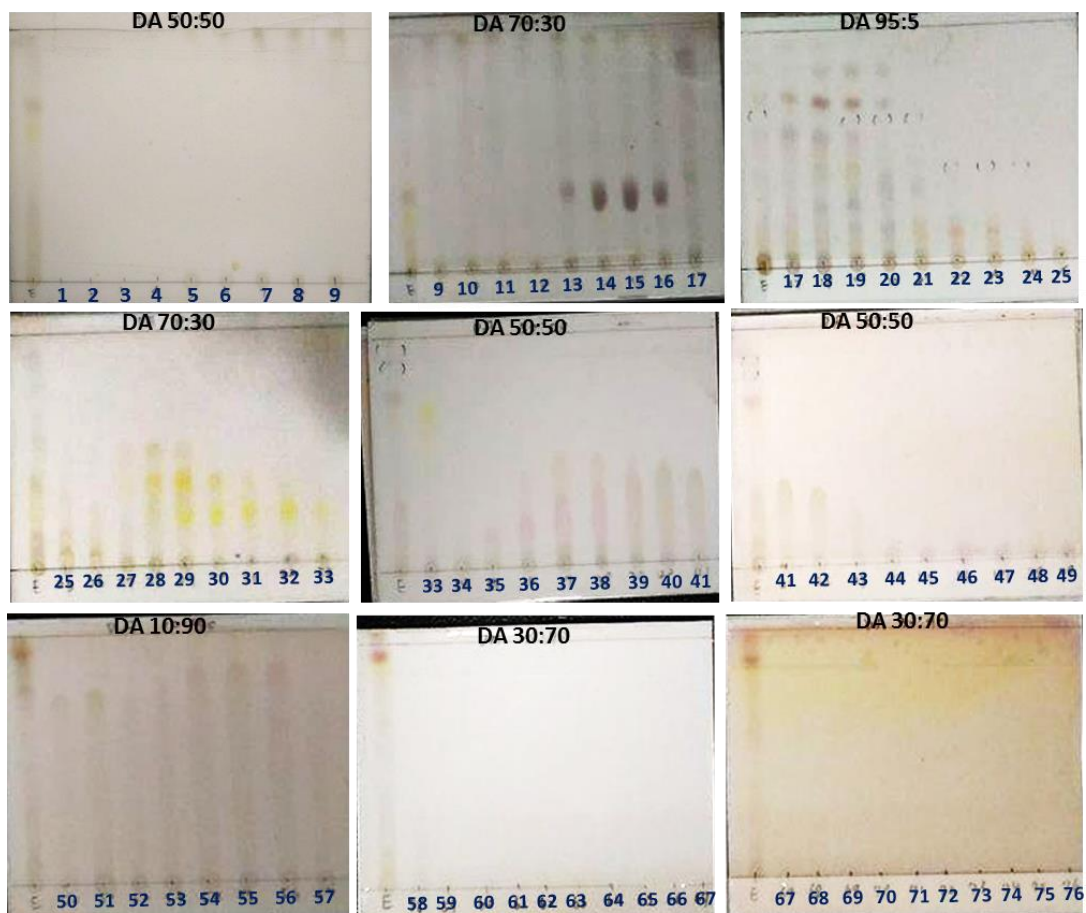

**Figure S2.** TLC result of subfractions from Fr. F5. Fractions before merge (mobile phase is labeled on the top of TLC plate)

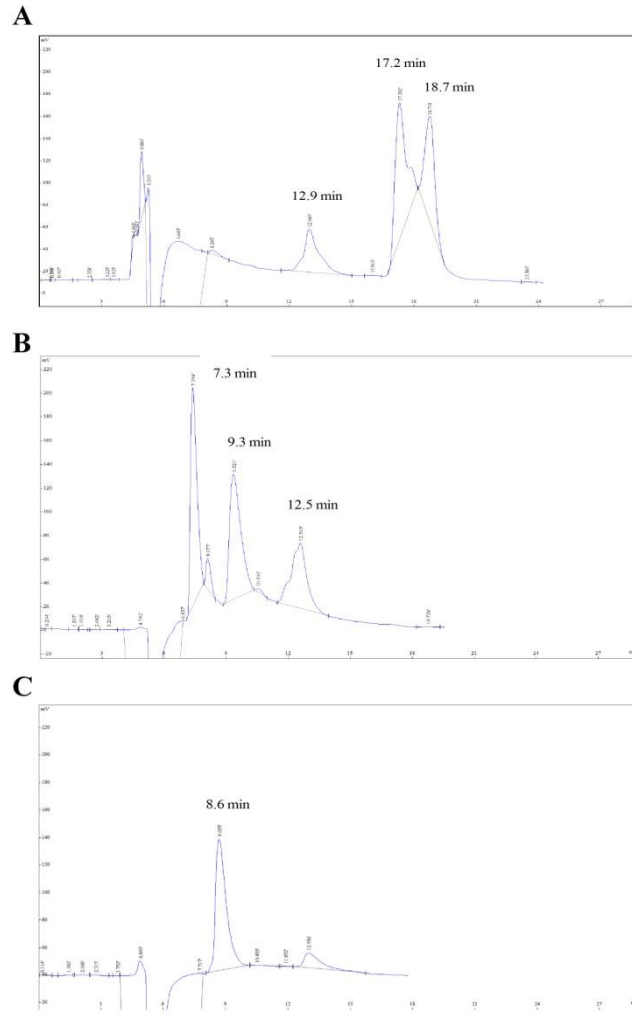

**Fig. S3.** The HPLC chromatogram. (A) HPLC chromatogram of Fr. F5b. (B) HPLC chromatogram of Fr. F5e. (B) HPLC chromatogram of Fr. F5f.

A

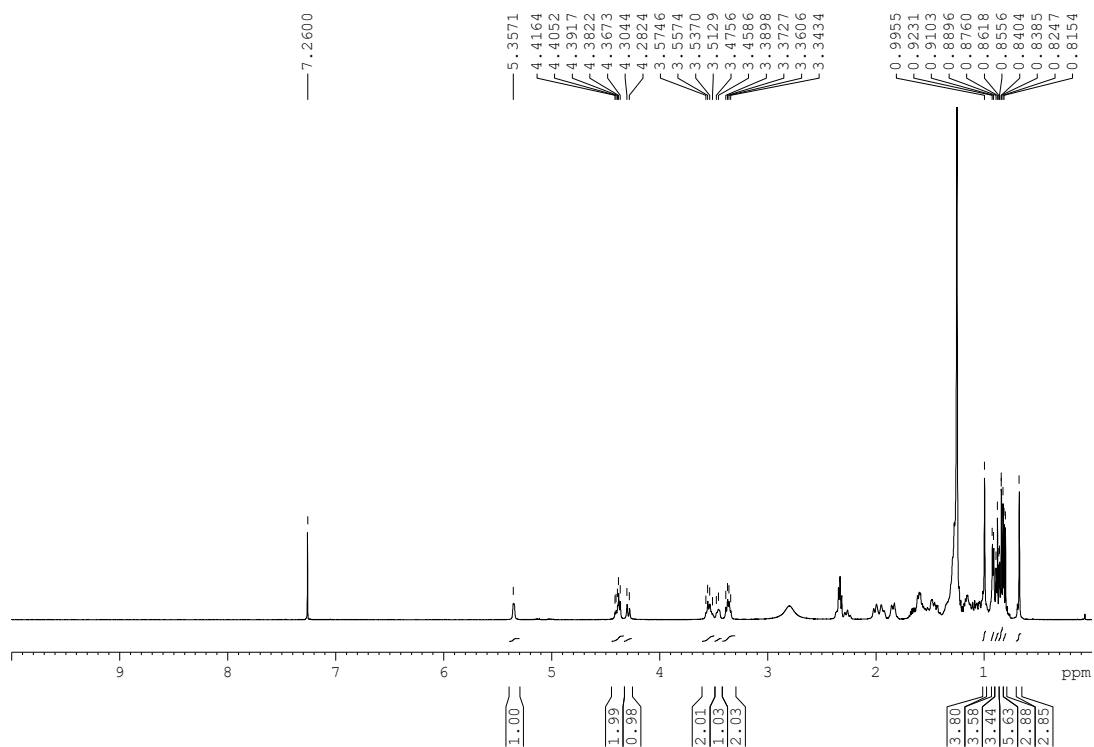

$^1\text{H}$  NMR spectrum of sitoindoside I in chloroform-*d*.

B

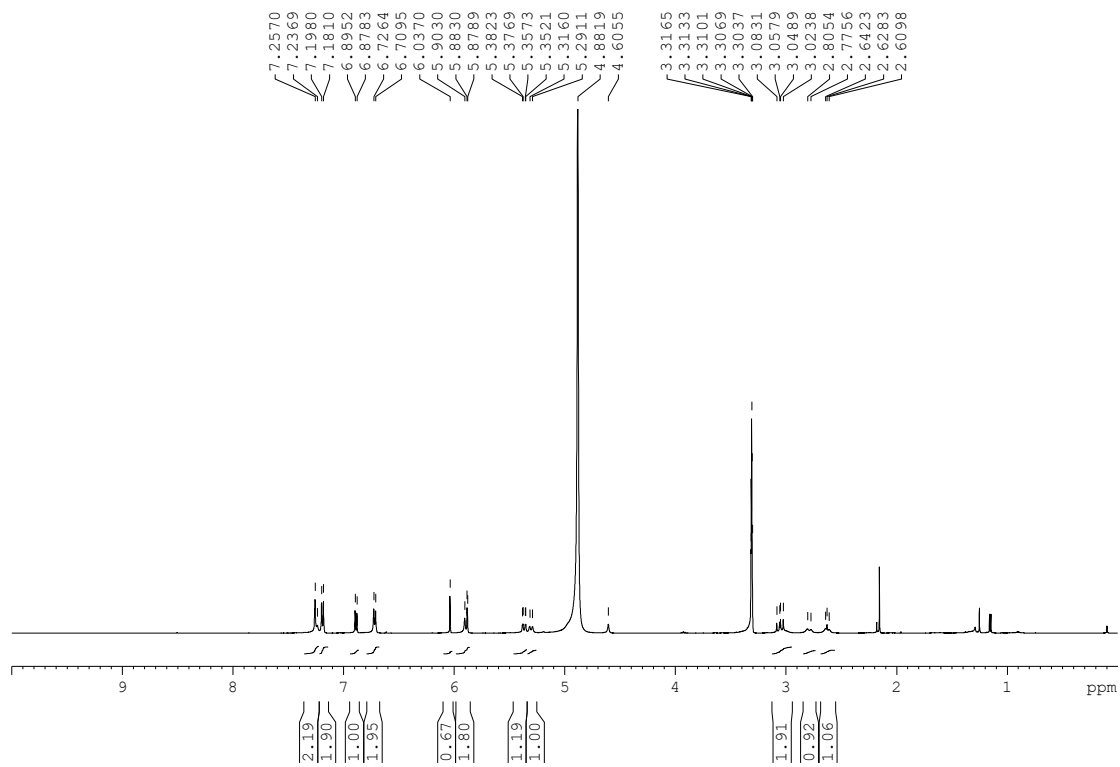

$^1\text{H}$  NMR spectrum of tetrahydroamentoflavone in methanol-*d*<sub>4</sub>.

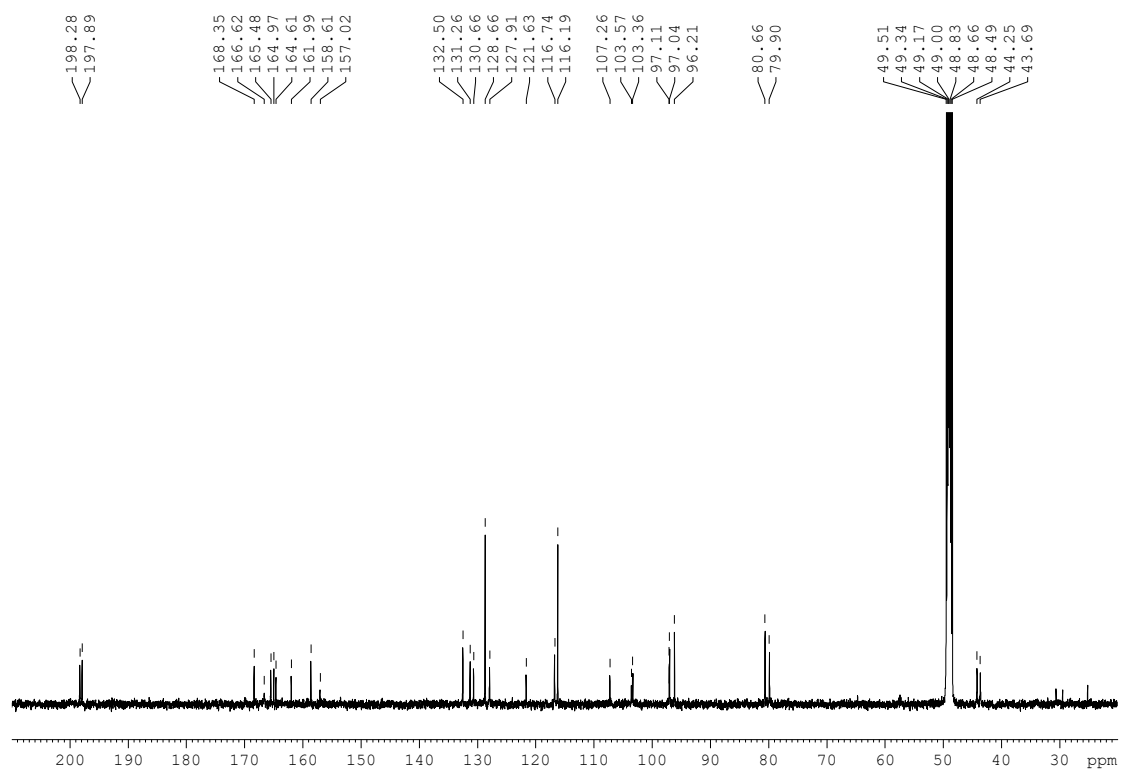

$^{13}\text{C}$  NMR spectrum of tetrahydroamentoflavone in methanol- $d_4$ .

C

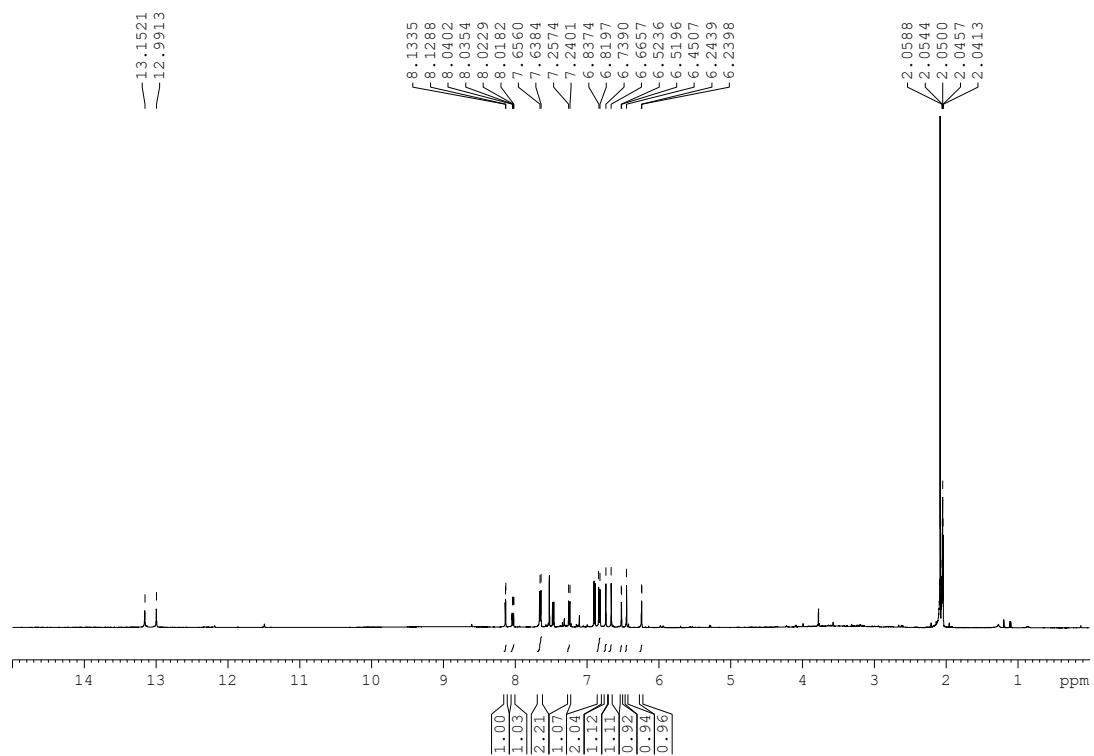

$^1\text{H}$  NMR spectrum of amentoflavone in acetone- $d_6$ .

D

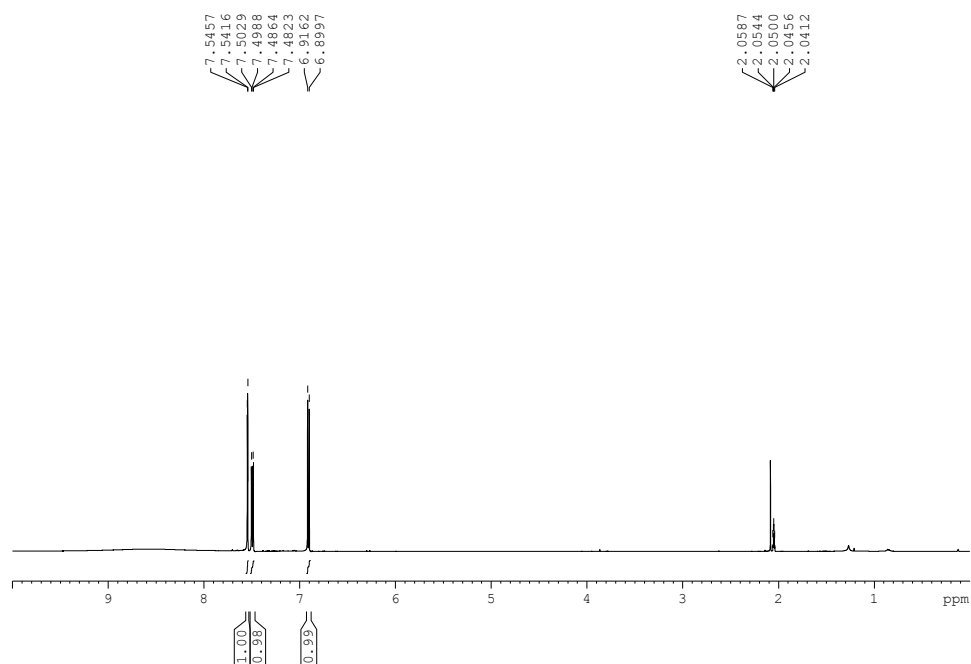

$^1\text{H}$  NMR spectrum of protocatechuic acid in acetone- $d_6$ .

**Fig. S4.** The NMR spectrum. (A)  $^1\text{H}$  NMR spectrum of sitoindoside I in chloroform- $d$ . (B)  $^1\text{H}$  NMR and  $^{13}\text{C}$  NMR spectrum of tetrahydroamentoflavone in methanol- $d_4$ . (C)  $^1\text{H}$  NMR spectrum of amentoflavone in acetone- $d_6$  (D)  $^1\text{H}$  NMR spectrum of protocatechuic acid in acetone- $d_6$ .
